# Supplementary material for: Identification of very small open reading frames in the genomes of Holmes Jungle virus, Ord River virus, and Wongabel virus of the genus Hapavirus, family Rhabdoviridae
Source: PubMed Central journal article supplement (PMC5510769; doi:10.1177/1176934317713484), 2017-07-11
Supplement: f_SupplementaryData_713484_8948.pdf [file f_SupplementaryData_713484_8948.pdf]

## SUPPLEMENTARY ONLINE DATA

**Supplementary Table S1:** Viruses and GenBank accession numbers used in phylogenetic analysis

| <b>VIRUS</b>                              | <b>ABBREVIATION</b> | <b>GENBANK ACCESSION</b> |
|-------------------------------------------|---------------------|--------------------------|
| Almpiwar virus                            | ALMV                | NC_025391.1              |
| Australian bat lyssavirus                 | ABLV                | NC_003243.1              |
| Aravan virus                              | ARAV                | EF614259.1               |
| Adelaide River virus                      | ARV                 | JN935380.1               |
| Bas-Congo virus                           | BASV                | JX297815.1               |
| Berrimah virus                            | BRMV                | HM461974.1               |
| Bovine ephemeral fever virus              | BEFV                | NC_002526.1              |
| Chandipura virus                          | CHPV                | AJ810083.1               |
| Coastal Plains virus                      | CPV                 | GQ294473.1               |
| Cocal virus                               | COCV                | EU373657.1               |
| Drosophila affinis sigma virus            | DAffSV              | GQ410980.1               |
| Drosophila melanogaster sigma virus AP30  | DmelSV AP30         | NC_013135.1              |
| Drosophila melanogaster sigma virus HAP23 | DMelSV HAP23        | GQ375258.1               |
| Drosophila obscura sigma virus            | DObsSV              | GQ410979.1               |
| Durham virus                              | DURV                | FJ952155.1               |
| Duvenhage virus                           | DUVV                | NC_020810.1              |
| European bat lyssavirus 1                 | EBLV1               | NC_009527.1              |
| European bat lyssavirus 2                 | EBLV2               | NC_009528.1              |
| Eel virus European X                      | EVEX                | FN557213.1               |
| Flanders virus                            | FLAV                | AF523199.1               |
| Gray Lodge virus                          | GLOV                | AJR28572                 |
| Harrison Dam virus                        | HARDV               | KJ432573.1               |
| Infectious haematopoietic necrosis virus  | IHNV                | X89213                   |
| Irkut virus                               | IRKV                | EF614260.1               |
| Isfahan virus                             | ISFV                | AJ810084.2               |
| Joinjakaka virus                          | JOIV                | AJR28531                 |
| Kamese virus                              | KAMV                | AJR28326                 |
| Khujand lyssavirus                        | KHUV                | EF614261.1               |
| Kimberley virus                           | KIMV                | JQ941664.1               |
| Kolente virus                             | KOLEV               | KC984953                 |
| Kotonkan virus                            | KOTV                | HM474855.1               |
| La Joya virus                             | LJV                 | AJR28296                 |
| Lagos Bat virus                           | LBV                 | EU259198.1               |
| Landjia virus                             | LJAV                | AJR28479                 |
| Lettuce necrotic yellows rhabdovirus      | LNyV                | NC_007642.1              |
| Lettuce yellow mottle virus               | LYMV                | NC_011532.1              |
| Manitoba virus                            | MANV                | AJR28463                 |
| Maraba virus                              | MARAV               | HQ660076.1               |
| Marco virus                               | MCOV                | AJR28445                 |
| Maize mosaic virus                        | MMV                 | NC_005975                |
| Mokola virus                              | MOKV                | NC_006429.1              |
| Mosqueiro virus                           | MQOV                | AJR28515                 |
| Mossuril virus                            | MOSV                | AJR28353                 |
| Moussa virus                              | MOUV                | FJ985748.1               |
| North cereal mosaic virus                 | NCMV                | NC_002251                |
| Ngaingan virus                            | NGAV                | NC_013955.1              |
| Niakha virus                              | NIAV                | KC585008.1               |
| North Creek virus                         | NORCV               | KF36097                  |
| Oak Vale virus 1342                       | OVRV 1342           | JF705876.1               |

|                                       |             |             |
|---------------------------------------|-------------|-------------|
| Oak Vale virus K13965                 | OVRV K13965 | JF705877.1  |
| Obodhiang virus                       | OBOV        | HM856902.1  |
| Parry Creek virus                     | PCRV        | AJR28317    |
| Pike Fry rhabdovirus                  | PFRV        | FJ872827.1  |
| Rabies virus                          | RABV        | NC_001542.1 |
| Rice yellow stunt virus               | RYSV        | NC_003746   |
| Scophthalmus maximus rhabdovirus      | SMRV        | HQ003891.1  |
| Snakehead rhabdovirus                 | SHRV        | NC_000903.1 |
| Sonchus yellow net virus              | SYNV        | NC_001615   |
| Spring viremia of carp virus          | SVCV        | NC_002803.1 |
| Tibrogargan virus                     | TIBV        | GQ294472.1  |
| Tupaia virus                          | TUPV        | NC_007020.1 |
| Viral haemorrhagic septicaemia virus  | VHSV        | NC_000855   |
| Vesicular stomatitis Alagoas virus    | VSAV        | EU373658.1  |
| Vesicular stomatitis virus Indiana    | VSIV        | AF473864.1  |
| Vesicular stomatitis virus New Jersey | VSNJV       | M20166.1    |
| Walkabout Creek virus                 | WACV        | NC_028232.1 |
| West Caucasian bat virus              | WCBV        | EF614258.1  |
| Wongabel virus                        | WONV        | NC_011639.1 |

**Supplementary Table S2: HOJV and ORRV transcription and replication control sequences**

| Junction       |       | Gene End                            | IGR  | Gene Start                                 |
|----------------|-------|-------------------------------------|------|--------------------------------------------|
| leader – N(U4) | HOJV  | n.a.                                | n.a. | <b>AGTAGTTCTTATGACTACATCTCAAATCAACAATG</b> |
|                | ORRV  | n.a.                                | n.a. | <b>AGTAGTTCTTATGACTACTTAACCAAGCAAAATG</b>  |
|                | WONV  | n.a.                                | n.a. | <b>AGTAGTTTTTCATGACTACATCTCCAAAAACAATG</b> |
| N(U4) – P      | HOJV* | <b>TAA</b> ...104 nt...CATGAAAAAAAA | TC   | <b>AGTAGTTATCATG</b>                       |
|                | ORRV  | <b>TAA</b> ...131 nt...CATGAAAAAAAA | TC   | <b>AGTAGTTATTATG</b>                       |
|                | WONV  | <b>TAA</b> ...131 nt...CATGAAAAAAAA | TC   | <b>AGTAGTTATCATG</b>                       |
| P – U1         | HOJV  | <b>TAA</b> ACCATGAAAAAAAA           | TC   | <b>AGTAGACATCTAGTCTACAAGATG</b>            |
|                | ORRV  | <b>TAA</b> AACATGAAAAAAAA           | TC   | <b>AGTAGATATCATATCTACACCATG</b>            |
|                | WONV  | <b>TGAT</b> CACATGAAAAAAAA          | TC   | <b>AGTAGACATCTAGTCTACAAGATG</b>            |
| U1 – U2        | HOJV  | <b>TGAT</b> CATGAAAAAAAA            | TC   | <b>GGCAGTCATCATG</b>                       |
|                | ORRV  | <b>TAGAT</b> CATGAAAAAAAA           | TC   | <b>GGCAGTCATCATG</b>                       |
|                | WONV  | <b>TAA</b> TACATGAAAAAAAA           | TC   | <b>GGCAGTCATCATG</b>                       |
| U2 – U3        | HOJV  | <b>TAA</b> ATCATGAAAAAAAA           | TC   | <b>AGTAGCAATCATG</b>                       |
|                | ORRV  | CATGAAAAAAAA                        | TT   | <b>AGTAGACATCATG</b>                       |
|                | WONV  | <b>TAA</b> ATCTTGAAAAAAAA           | TC   | <b>AGTAGTCATCATG</b>                       |
| U3 – M         | HOJV  | <b>TGAT</b> CATGAAAAAAAA            | CT   | <b>AGCAGAAATCATG</b>                       |
|                | ORRV  | <b>TGACAC</b> ATGAAAAAAAA           | TT   | <b>AGCAGCAATCATG</b>                       |
|                | WONV  | <b>TAA</b> ATACATGAAAAAAAA          | TC   | <b>AGCAGTCATCATG</b>                       |
| M – G(U5)      | HOJV  | <b>TAAC</b> ATGAAAAAAAA             | CC   | <b>AGTAGACATATTGAATACAAAATG</b>            |
|                | ORRV  | <b>TAAC</b> ATGAAAAAAAA             | TT   | <b>AGTAGACATATTGTCTAATTTTTTGAAAATG</b>     |
|                | WONV  | <b>TAAC</b> ATGAAAAAAAA             | CT   | <b>AGTAGACATATTGATTACAAGATG</b>            |
| G(U5) – L      | HOJV  | CATGAAAAAAAA                        | CC   | <b>AGTAGGCATTATG</b>                       |
|                | ORRV  | CATGAAAAAAAA                        | CT   | <b>AGTAGACATAATG</b>                       |
|                | WONV  | CTTGAAAAAAAA                        | CT   | <b>AGCAGTCATAATG</b>                       |
| L – trailer    | HOJV  | <b>TAA</b> ...29 nt...CATGAAAAAAAA  | n.a. | n.a.                                       |
|                | ORRV  | <b>TAA</b> ...29 nt...CATGAAAAAAAA  | n.a. | n.a.                                       |
|                | WONV  | <b>TAA</b> ...28 nt...CATGAAAAAAAA  | n.a. | n.a.                                       |

Stop and start codons are bolded and underlined, putative transcription start signals are bolded, and the transcription stop/polyadenylation signals are underlined. IGR, intergenic region. Remnant/non-functional or alternate translation start signals in the HOJV and ORRV N proteins, and a premature stop signal in the ORRV N protein are in grey type. (\*) HOJV does not contain a U4 ORF. In ORRV and WONV, the first marked stop codon relates to the N ORF and the second marked stop codon (which overlaps the transcription stop signal in both viruses) relates to the U4 ORF. Brackets indicate overlapping ORFs.

```

ORRV      MLKIWRKKGKANYAQSSNLSDTTSPYDWAYGSSEPIELFSPTAPPVYETKNSKFHVMGQI
WONV      MLKIWRKKGRKHESDVSTVSDTSSPYDWAYGTSEPIELFSPTAPPVYETKSSKFHVMSQL
HOJV      MLKIWRKKGKAGSTSSNLSSETTSPYDWAYGASEPIKLFSPPTAPPVYETKNSKFHVMCQL
*****_ : * _ :*:*:*****:****:*****_***** *:

ORRV      KIVTKLSIDSPMLCQVLEQIVLKYNGSFKFKDHLLNLILVGTHMKRELDHDTYVYKGL
WONV      KIATKLSIGSAEILCQILEQIVQKYNGSFKFKSHLLNLILVGTHMKKELDHDSFIYKGL
HOJV      RIVTKLSIENAEILCQILEQIVQKYNGSFKYKNHLLMNLILVGTHMKKELDHDSFIYKGL
_*_******_*:***:***** *****:*_***:*****_*****:~:*****

ORRV      WDDVIVYEGIDADTNGFGNKFELYHRYKIKGQELAVHFESDLRLTTRSGMTYFEVYNIPM
WONV      WDDVILYEGLDVDTNNOGNKFEIYHKYKIKGFDMAIHFESDLRMTTRSGMTFYEVYNIPM
HOJV      WDDVILYEGLDADTNVPGNKFELIYHKYKIKGYDMAIHFESDLRMTTRSGMTFYEVYNIPM
*****:***:*_*** *****:*_***** :*:*****:*****:*****

ORRV      SSGRNPPILNWMRTELGI
WONV      SSGRNPPILNWMRTELGI
HOJV      SSGRNPPILNWMKTELGI
*****_*****

```

**Supplementary Figure S1:** Multiple (MUSCLE) sequence alignment of the M proteins of HOJV, ORRV and WONV. Fully conserved (\*), strongly conserved (:) and weakly conserved (.) amino acids are marked. Five in-frame methionine residues conserved between all three viruses at positions 57, 106, 170, 180 and 192, which may be suggestive of the generation of shorter M protein translation products, are marked in red.
